## Elevated LRRK2 and $\alpha$ -synuclein levels in CSF of infectious meningitis patients

Susanne Herbst<sup>1,7</sup>, Suzaan Marais<sup>2,6,7</sup>, Maximiliano G. Gutierrez<sup>1</sup>, Simon J Waddell<sup>3</sup>, Robert J. Wilkinson<sup>2,4,5</sup> and Rachel PJ Lai<sup>4,5</sup>

1. Host-Pathogen Interactions in Tuberculosis Laboratory, The Francis Crick Institute, London, UK
2. CIDRI Africa, Institute of Infectious Disease and Molecular Medicine, University of Cape Town, South Africa
3. Department of Global Health and Infection, University of Sussex, Brighton, UK
4. Tuberculosis Laboratory, The Francis Crick Institute, London, UK
5. Department of Medicine, Imperial College London, London, UK
6. Current address: Department of Neurology, Inkosi Albert Luthuli Central Hospital and University of KwaZulu-Natal, Durban, South Africa
7. These authors contributed equally to this work

Corresponding author: Susanne Herbst and Suzaan Marais

### Abstract

Neurodegenerative diseases such as Parkinson's (PD) have a complex aetiology consisting of an interplay of genetic and environmental factors. Inflammation and infection are proposed external factors that trigger disease progression. Tuberculous and cryptococcal meningitis frequently lead to long-term neurological sequelae but their association with the development of PD are unexplored. In this study, we protein profiled the CSF from 76 patients with or without infectious meningitis and found that proteins commonly associated with PD (LRRK2, tau and alpha-synuclein) were significantly elevated, establishing a link between neuroinflammation and infection. Importantly, these findings suggest that LRRK2, tau and alpha-synuclein could represent biomarkers of neuroinflammation.

### Introduction

An increasing body of evidence implicates neuroinflammation in the aetiology of neurodegenerative diseases such as Parkinson's Disease (PD). It has been speculated that infection-induced inflammation can lead to damage in neuronal viability and functionality, thus contributing to neurodegenerative disease progression<sup>1</sup>. Elevated concentrations of pro-inflammatory cytokines have been detected in both cerebrospinal fluid (CSF) and post-mortem brain tissue samples of PD patients<sup>2</sup>. The precise aetiology of PD is largely unknown and likely consists of a complex interplay between genetic and environmental factors. The most common underlying genetic cause for inherited forms of PD are mutations in Leucine-rich repeat kinase 2 (LRRK2) and it has been hypothesised that infectious diseases constitute an environmental trigger for PD development<sup>3</sup>. Additionally, infections in the periphery are known to worsen motor function in PD patients, indicating that inflammatory mediators directly impact disease progression<sup>4</sup>.

Infectious meningitis caused by either *M. tuberculosis* or *C. neoformans* is characterised by the increase of inflammatory and neural injury makers in the meninges<sup>5-8</sup>. In both tuberculous and cryptococcal meningitis (TBM and CM), up to half of survivors experience neurological sequelae with deficits that may be similar to those in neurodegenerative diseases, such as impaired cognition and movement disorder.

Here we report the results of a large-scale proteomic analysis comparing protein signatures in the CSF from patients with or without infectious meningitis (TBM, CM, or viral meningoencephalitis, VM). We identified a cluster of proteins that is functionally associated with neurodegenerative diseases, including LRRK2,  $\alpha$ -synuclein and tau. CSF abundance of these proteins was elevated in patients with TBM and

62 CM and positively correlated with inflammatory cytokines. Together, the data suggest that  
63 neurodegeneration-associated proteins can be considered inflammatory markers themselves that  
64 respond to infectious disease triggers.

65

## 66 **Methods**

67

68 Adults (age  $\geq 18$ ) with suspected meningitis who underwent lumbar puncture as part of their diagnostic  
69 workup were recruited into a diagnostic study<sup>9</sup> at Mitchell's Plain Hospital and Khyelitsha Hospital,  
70 Cape Town, South Africa. Patients were excluded if bacterial meningitis other than TB was suspected  
71 (cloudy or pus-like CSF). The study was approved by the University of Cape Town Human Research  
72 Ethics Committee (HREC REF: 730/2014). Informed consent was obtained from all fully conscious  
73 patients. Patients with impaired consciousness were enrolled and patient consent was sought when  
74 capacity was regained. If death occurred before capacity was regained data was included following  
75 ethical approval.

76

77 TBM was diagnosed using the consensus case definition<sup>10</sup> where (i) definite cases had at least one of  
78 the following CSF findings: acid-fast bacilli seen, *Mtb* cultured or GeneXpert MTB/RIF positive and (ii)  
79 probable cases had a total diagnostic score of  $\geq 12$  (if cerebral imaging was performed) or  $\geq 10$  (if no  
80 cerebral imaging was performed). Possible TBM cases and possible pyogenic meningitis cases were  
81 excluded from this study. CM was diagnosed by positive CSF cryptococcal latex antigen test or  
82 culture. Patients were classified as VM if they presented with symptoms and signs of meningitis, had  
83 raised CSF lymphocytes (with or without raised protein and decreased glucose) and recovered  
84 without treatment directed at any specific organism. Herpes simplex virus (HSV) meningitis was  
85 diagnosed by positive CSF HSV PCR or by a good clinical response to acyclovir. Patients without  
86 CNS infection (other than HIV-1) who presented with chronic headaches, psychosis, or HIV-  
87 associated neurocognitive disorder were included as non-meningitis controls. HIV status was known  
88 for all participants.

89

90 SOMAscan, an aptamer-based multiplexed proteomics assay, was used to measure the abundance  
91 of protein analytes in CSF samples (SomaLogic, Inc.; Boulder CO, USA). Briefly, SOMAmer reagents  
92 bind with high affinity and specificity to their cognate protein target in the CSF, which are then  
93 released and hybridised to a DNA array, resulting in relative luminescence units (RLU) as a readout  
94 that is directly proportional to the concentration of the corresponding protein in each CSF sample.  
95 SOMAscan data of all samples were hybridisation-normalised and adjusted for plate scaling factors  
96 calculated from signals from the control probes. Statistical differences between patient groups of each  
97 protein of interest were calculated using two-tailed Mann Whitney *U* test and  $p < 0.05$  was considered  
98 significant. Correlation analysis was performed using the ggpubr package on R using Spearman's  
99 Rank and  $p < 0.05$  was considered significant.

100

101 For Western Blotting, CSF proteins were precipitated with methanol (1:3 v/v). Proteins were detected  
102 with the following antibodies: LRRK2 (clone N241A/34, NeuroMab; Davis CA, USA),  $\alpha$ -synuclein  
103 (clone MJFR1, Abcam, Cambridge UK), Tau (clone D1M9X) and  $\beta$ -actin-HRP (both from Cell  
104 Signaling; Hitchin UK). Protein loading was assessed by Ponceau S staining.

105

## 106 **Results**

107

108 A total of 76 patients were enrolled into this study, including 20 with TBM (13 definite and 7 probable;  
109 HIV-infected=17); 24 with CM (HIV-infected=24); seven with VM (HIV-infected=3) of whom two had  
110 HSV meningitis; and 25 controls without meningitis (HIV-infected=6).

111

112 As previously reported, the proteomic analysis of CSF identified increased levels of inflammatory  
113 cytokines, such as TNF- $\alpha$ , IL-1 $\beta$  and IFN- $\beta$  in all meningitis samples (**Fig 1A**). This was paralleled by  
114 an increase in cerebral injury markers such as matrix metalloproteinase 9 (MMP-9), glial fibrillary acidic  
115 protein (GFAP) and ubiquitin C-terminal hydrolase L1 (UCH-L1) (**Fig 1B**). TBM induced the highest  
116 increase in both inflammatory cytokines and injury markers, and VM consistently showed only a mild  
117 increase of these proteins. In addition to the inflammatory protein pattern, we observed an unexpected  
118 increase in a group of proteins typically associated with neurodegenerative diseases, such as LRRK2,  
119 tau and  $\alpha$ -synuclein in patients with CM and TBM. Specifically, TBM showed 2-fold higher median levels  
120 in tau and  $\alpha$ -synuclein and a striking 10-fold elevation in LRRK2 levels, when compared to non-  
121 meningitis controls (**Fig 2A**). We validated the proteomics findings by Western Blotting and confirmed

122 that LRRK2,  $\alpha$ -synuclein and tau were significantly elevated in TBM, and to a lesser extent in CM, when  
123 compared to CSF from control individuals (**Fig 2B**).

124  
125 Sub-analyses based on outcome were performed on CM and TBM where a subset of patients died,  
126 thus were considered to have more severe infection at the time of sampling. While disease severity  
127 impacted the CSF abundance of inflammatory cytokines (**Figure 3A**), there were no difference in the  
128 levels of these neurodegenerative disease-associated proteins (**Figure 3B**), suggesting that the  
129 aetiology may be a more important determinant. Sub-analysis on the impact of HIV-1 coinfection was  
130 not performed on the three meningitis groups as the number of non-HIV-1 infected patients was too  
131 small for statistical analysis.

132  
133 Studies in PD showed that the CSF levels of neurodegeneration-related proteins significantly correlate  
134 with inflammatory cytokines including TNF- $\alpha$  and IL-6<sup>11,12</sup>. Similarly, we found a significant correlation  
135 between LRRK2 and the inflammatory cytokines TNF- $\alpha$  and IL-1 $\beta$  and the neural injury marker UCH-  
136 L1 in TBM, CM and VM (**Fig 4**) suggesting that LRRK2 expression is associated with inflammatory  
137 responses.

138

139

## 140 Discussion

141

142 In this study, we show a significant and selective upregulation of proteins associated with  
143 neurodegenerative diseases in the CSF of patients suffering from tuberculous and cryptococcal  
144 meningitis. Our findings implicate these proteins as potential markers of neuroinflammation and/or brain  
145 damage that could functionally contribute to meningitis pathology. The up-regulation of LRRK2 in the  
146 CSF additionally raises the question if infections can affect long-term brain function by resulting in the  
147 infiltration of LRRK2 and  $\alpha$ -synuclein expressing monocytes/neutrophils from the periphery, thereby  
148 contributing to PD development in genetically susceptible individuals. This is of special interest as the  
149 penetrance of LRRK2 mutations is incomplete, ranging from 40-75% at the age of 80<sup>13,14</sup>. As such, our  
150 findings indicate infections might constitute an environmental factor that contributes to disease  
151 development.

152

153 Studies examining the history of CNS infections in a general population of PD patients have found only  
154 a weak correlation between PD disease development and CNS infections<sup>15</sup>. Importantly, longitudinal  
155 studies that specifically examine the relationship between infectious disease history and PD  
156 development in LRRK2 mutation carriers are lacking. It has been shown that  $\alpha$ -synuclein is also up-  
157 regulated in the enteric nervous system during inflammation or after viral infection<sup>16</sup> and our results  
158 provide additional evidence supporting the idea that  $\alpha$ -synuclein is implicated in inflammatory  
159 processes. Several studies explored the monitoring of LRRK2 expression levels in peripheral blood or  
160 CSF as a potential biomarker for PD<sup>17,18</sup>. Here, we found that in CSF of patients with infectious  
161 meningitis, LRRK2 protein levels are significantly increased and robustly correlated with the protein  
162 levels of the inflammatory cytokines TNF- $\alpha$  or IL-1 $\beta$ . The findings reported here provide further evidence  
163 for an association between LRRK2 with inflammation, immunity and infection. We only observed a  
164 significant increase of LRRK2,  $\alpha$ -synuclein and tau in patients suffering from tuberculous and  
165 cryptococcal meningitis but not viral meningitis. We cannot definitively conclude that specific infectious  
166 agents cause an upregulation of this protein cluster in the CSF, as the VM patients only showed a mild  
167 increase in inflammatory and injury markers when compared to CM and TBM patients indicating that  
168 disease severity might be a determining factor. Nevertheless, in CM and TBM disease severity, as  
169 defined by outcome, is not associated with the elevation of these neurodegeneration-related proteins.

170

171 Overall, this proteomic analysis suggest that certain proteins associated with neurodegeneration, and  
172 PD in particular, can be considered as markers of inflammation, and that inflammatory triggers such as  
173 infectious diseases can result in the shuttling of these neurotoxic proteins to the CNS.

174

175

## 176 Acknowledgements

177

178 The authors would like to acknowledge the contributions of the laboratory staff at the Center for  
179 Infectious Diseases Research in Africa (CIDRI-Africa) and the doctors and nurses who cared for the  
180 study patients and the patients who participated. We would also like to thank Muki Shey for assisting  
181 with sample preparation. SH, MG and RJW were funded by the Francis Crick Institute which receives

182 core funding from Cancer Research UK, the UK Medical Research Council and the Wellcome Trust  
183 (FC001092 to MGG and FC00110218 to RJW). RJW and SM are supported by the Wellcome Trust  
184 (104803 and 203135 for RJW and 097254 for SM). RPJL is supported by the UK Medical Research  
185 Council (MR/R008922/1).

186  
187

#### 188 **Author Contributions**

189

190 SM, RJW and RPJL conceived and designed the study. SM recruited, sampled and collected data  
191 from patients. SH, SM and RPJL performed experiments and analysed the data. SW provided data  
192 acquisition tool. SH, SM, MGG, RJW and RPJL wrote the manuscript with inputs from SW.

193  
194

#### 195 **Conflicts of Interest**

196

197 The authors declare no conflict of interest.

198  
199

#### 200 **Figure legends**

201

##### 202 **Figure 1:**

203

204 Cerebrospinal fluid abundance of **(A)** inflammatory markers and **(B)** brain injury markers were  
205 measured in control patients without meningitis and in those suffering from viral (VM), cryptococcal  
206 (CM) and tuberculous (TBM) meningitis.

207

##### 208 **Figure 2:**

209

210 **(A)** Cerebrospinal fluid abundance of neurodegeneration-associated proteins were measured in  
211 control patients without meningitis and in those with viral (VM), cryptococcal (CM) and tuberculous  
212 (TBM) meningitis. **(B)** Western Blotting of CSF proteins for LRRK2, Tau and  $\alpha$ -synuclein. Ponceau S  
213 stain is used as an indicator for total protein amounts.

214

##### 215 **Figure 3:**

216

217 Sub-analyses were performed to decipher the impact of disease severity on cerebrospinal fluid  
218 abundance of **(A)** inflammatory cytokines and **(B)** neurodegeneration-associated proteins in patients  
219 with cryptococcal (CM) and tuberculous (TBM) meningitis. There was no mortality in control non-  
220 meningitis patients or those with viral meningitis.

221

##### 222 **Figure 4:**

223

224 Correlation analysis between LRRK2 and the inflammatory mediators **(A)** TNF- $\alpha$  and **(B)** IL-1 $\beta$  and  
225 **(C)** the brain injury marker UCH-L1 in CSF samples of patients suffering from viral meningitis (VM),  
226 cryptococcal meningitis (CM) and tuberculous meningitis (TBM).

227

228

229 **References:**

- 230
- 231 1. Perry, V.H., Cunningham, C. & Holmes, C. Systemic infections and inflammation affect  
232 chronic neurodegeneration. *Nat Rev Immunol* **7**, 161-167 (2007).
- 233 2. Lindqvist, D., *et al.* Cerebrospinal fluid inflammatory markers in Parkinson's disease--  
234 associations with depression, fatigue, and cognitive impairment. *Brain Behav Immun* **33**, 183-  
235 189 (2013).
- 236 3. Johnson, M.E., Stecher, B., Labrie, V., Brundin, L. & Brundin, P. Triggers, Facilitators, and  
237 Aggravators: Redefining Parkinson's Disease Pathogenesis. *Trends Neurosci* **42**, 4-13  
238 (2019).
- 239 4. Brugger, F., *et al.* Why is there motor deterioration in Parkinson's disease during systemic  
240 infections-a hypothetical view. *NPJ Parkinsons Dis* **1**, 15014 (2015).
- 241 5. Marais, S., *et al.* Neutrophil-associated central nervous system inflammation in tuberculous  
242 meningitis immune reconstitution inflammatory syndrome. *Clin Infect Dis* **59**, 1638-1647  
243 (2014).
- 244 6. Rohlwink, U.K., *et al.* Biomarkers of Cerebral Injury and Inflammation in Pediatric  
245 Tuberculous Meningitis. *Clin Infect Dis* **65**, 1298-1307 (2017).
- 246 7. Lan, S.H., Chang, W.N., Lu, C.H., Lui, C.C. & Chang, H.W. Cerebral infarction in chronic  
247 meningitis: a comparison of tuberculous meningitis and cryptococcal meningitis. *QJM* **94**,  
248 247-253 (2001).
- 249 8. Tugume, L., *et al.* HIV-Associated Cryptococcal Meningitis Occurring at Relatively Higher  
250 CD4 Counts. *J Infect Dis* **219**, 877-883 (2019).
- 251 9. Heemskerck, A.D., *et al.* Improving the microbiological diagnosis of tuberculous meningitis: A  
252 prospective, international, multicentre comparison of conventional and modified Ziehl-Neelsen  
253 stain, GeneXpert, and culture of cerebrospinal fluid. *J Infect* (2018).
- 254 10. Marais, S., *et al.* Tuberculous meningitis: a uniform case definition for use in clinical research.  
255 *Lancet Infect Dis* **10**, 803-812 (2010).
- 256 11. Delgado-Alvarado, M., *et al.* Tau/alpha-synuclein ratio and inflammatory proteins in  
257 Parkinson's disease: An exploratory study. *Mov Disord* **32**, 1066-1073 (2017).
- 258 12. Hall, S., *et al.* Cerebrospinal fluid concentrations of inflammatory markers in Parkinson's  
259 disease and atypical parkinsonian disorders. *Sci Rep* **8**, 13276 (2018).
- 260 13. Ferreira, M. & Massano, J. An updated review of Parkinson's disease genetics and  
261 clinicopathological correlations. *Acta Neurol Scand* **135**, 273-284 (2017).
- 262 14. Lee, A.J., *et al.* Penetrance estimate of LRRK2 p.G2019S mutation in individuals of non-  
263 Ashkenazi Jewish ancestry. *Mov Disord* **32**, 1432-1438 (2017).
- 264 15. Fang, F., *et al.* CNS infections, sepsis and risk of Parkinson's disease. *Int J Epidemiol* **41**,  
265 1042-1049 (2012).
- 266 16. Stolzenberg, E., *et al.* A Role for Neuronal Alpha-Synuclein in Gastrointestinal Immunity. *J*  
267 *Innate Immun* **9**, 456-463 (2017).
- 268 17. Cook, D.A., *et al.* LRRK2 levels in immune cells are increased in Parkinson's disease. *NPJ*  
269 *Parkinsons Dis* **3**, 11 (2017).
- 270 18. Wang, S., *et al.* Elevated LRRK2 autophosphorylation in brain-derived and peripheral  
271 exosomes in LRRK2 mutation carriers. *Acta Neuropathol Commun* **5**, 86 (2017).
- 272

# Figure 1

## A)

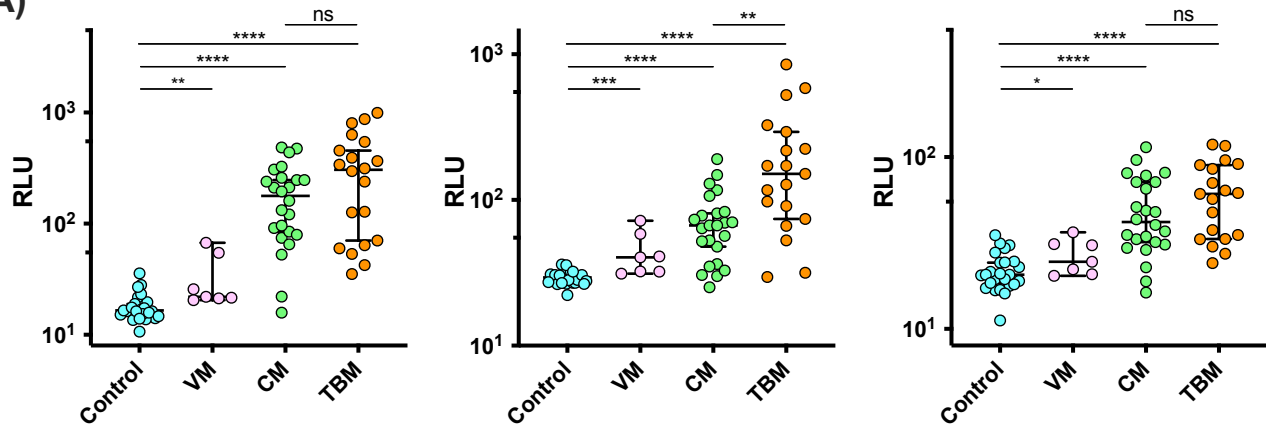

## B)

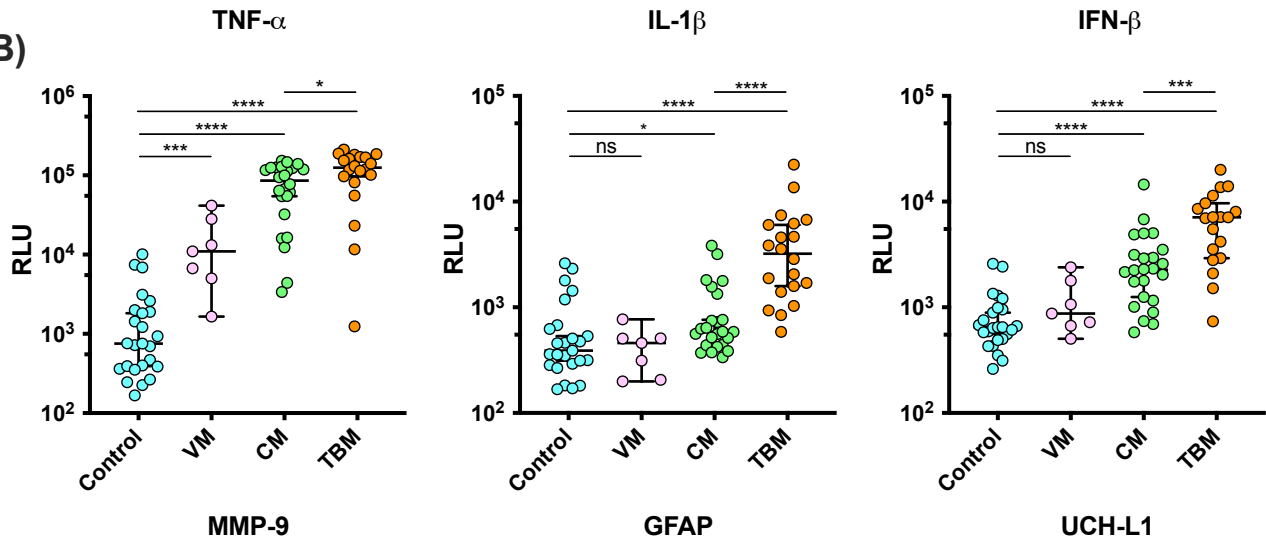



## Figure 2

A)

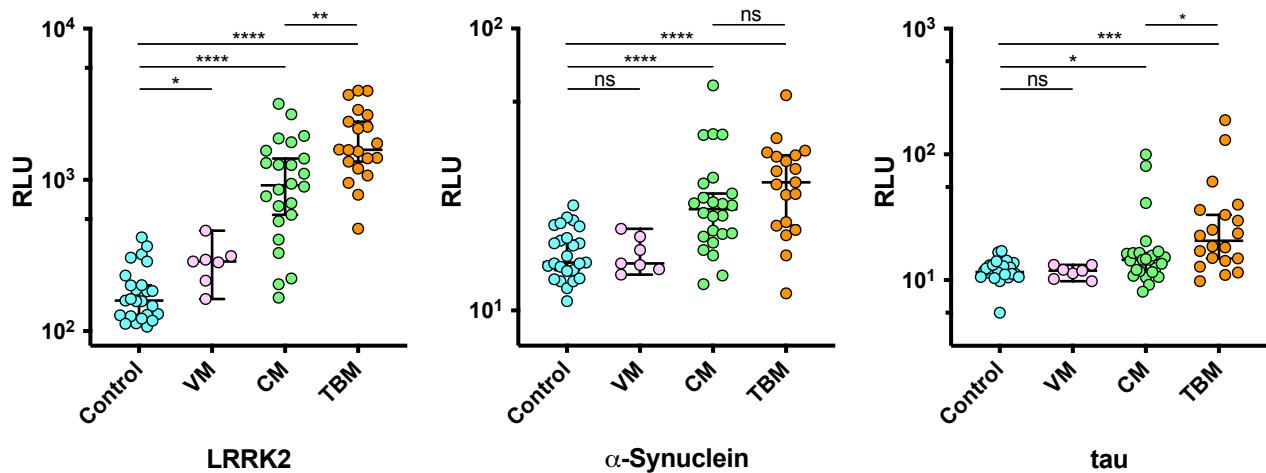

B)

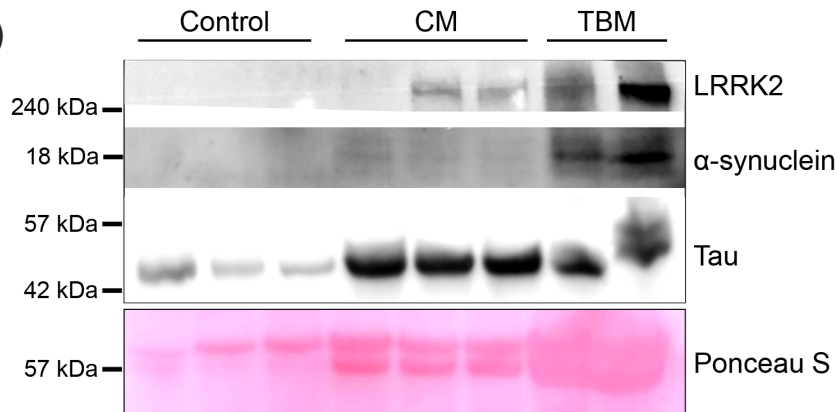





**Figure 4**

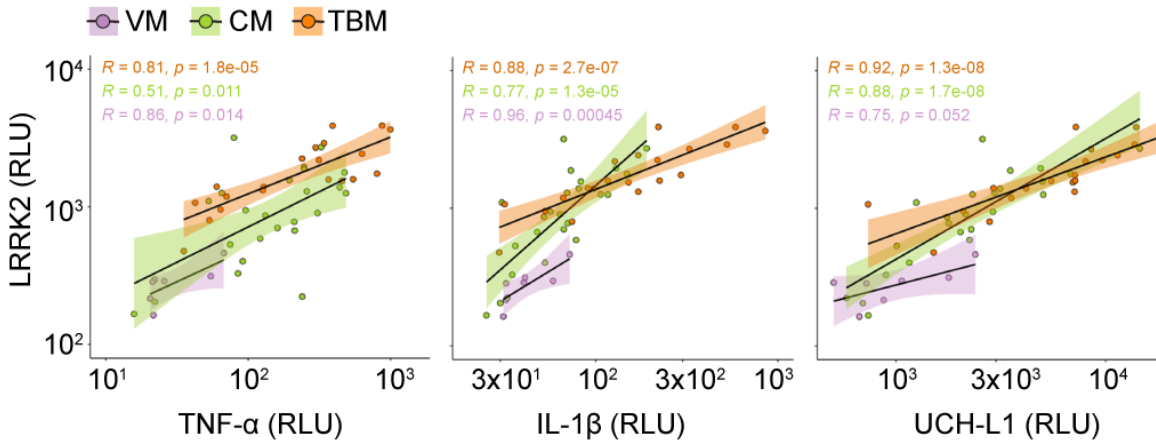

Source: http://biorxiv.org/content/10.1101/599381v1.full.pdf
